# Supplementary material
Source: PubMed Central journal article supplement (PMC3215574)
Supplement: supp_124.21.3631_JCS086082TableS1.pdf [file supp_124.21.3631_JCS086082TableS1.pdf]

**Table S1. Chi-squared values of the fits of wild type and mutated EGFP-RAR autocorrelation curves with different diffusion models**

|                      | <b>AM580</b> | <b>one-component free</b> | <b>anomalous</b> | <b>two-component free</b> |
|----------------------|--------------|---------------------------|------------------|---------------------------|
| <b>EGFP</b>          | -            | <b>41.9</b>               | <b>37.2</b>      | <b>21.3</b>               |
| <b>EGFP-RAR</b>      | -            | <b>103.1</b>              | <b>33.3</b>      | <b>25.9</b>               |
|                      | +            | <b>80.2</b>               | <b>35.4</b>      | <b>25.7</b>               |
| <b>EGFP-RAR-AR</b>   | -            | <b>91.3</b>               | <b>33.7</b>      | <b>24.2</b>               |
|                      | +            | <b>87.9</b>               | <b>32.7</b>      | <b>23.5</b>               |
| <b>EGFP-RAR-VA</b>   | -            | <b>79.5</b>               | <b>33.7</b>      | <b>26.6</b>               |
|                      | +            | <b>76.7</b>               | <b>30.6</b>      | <b>26.1</b>               |
| <b>EGFP-RAR-WA</b>   | -            | <b>89.0</b>               | <b>59.0</b>      | <b>21.4</b>               |
|                      | +            | <b>92.9</b>               | <b>65.0</b>      | <b>20.7</b>               |
| <b>EGFP-RAR-dH12</b> | -            | <b>77.4</b>               | <b>26.1</b>      | <b>20.4</b>               |
|                      | +            | <b>78.3</b>               | <b>27.0</b>      | <b>23.0</b>               |
| <b>EGFP-RAR-LBD</b>  | -            | <b>65.5</b>               | <b>35.9</b>      | <b>21.8</b>               |
|                      | +            | <b>70.9</b>               | <b>33.0</b>      | <b>23.7</b>               |
| <b>EGFP-RAR-mZN</b>  | -            | <b>68.0</b>               | <b>28.9</b>      | <b>24.9</b>               |
|                      | +            | <b>69.9</b>               | <b>30.4</b>      | <b>25.1</b>               |
