# Supplementary material
Source: PubMed Central journal article supplement (PMC3215574)
Supplement: supp_124.21.3631_JCS086082TableS2.pdf [file supp_124.21.3631_JCS086082TableS2.pdf]

**Table S2. Mobility parameters of wild-type and mutated EGFP-RAR with different diffusion models. Data represent the best-fit parameters to the one-component anomalous**

| 100 nM AM580                                    |   | 2-component free diffusion |           |           |
|-------------------------------------------------|---|----------------------------|-----------|-----------|
|                                                 |   | _1 (ms)                    | _2 (ms)   | r2        |
| EGFP-RAR                                        | - | 2.64 ± 0.65                | 97 ± 57   | 29% ± 7%  |
| EGFP-RAR                                        | + | 2.87 ± 0.99                | 89 ± 45   | 43% ± 9%  |
| EGFP-RAR-A392R<br>(activator binding mutant)    | - | 2.69 ± 0.73                | 108 ± 81  | 27% ± 8%  |
|                                                 | + | 2.83 ± 0.92                | 92 ± 56   | 39% ± 11% |
| EGFP-RAR-W225A<br>(repressor binding mutant)    | - | 2.64 ± 1.07                | 119 ± 81  | 22% ± 8%  |
|                                                 | + | 2.54 ± 0.5                 | 127 ± 80  | 26% ± 7%  |
| EGFP-RAR-V395A<br>(cofactor non-binding mutant) | - | 2.66 ± 1.29                | 120 ± 112 | 20% ± 8%  |
|                                                 | + | 2.65 ± 0.84                | 116 ± 121 | 19% ± 9%  |
| EGFP-RAR-dH12<br>(Helix-12 deleted mutant)      | - | 2.83 ± 0.81                | 120 ± 62  | 26% ± 7%  |
|                                                 | + | 3.17 ± 0.84                | 124 ± 58  | 27% ± 7%  |
| EGFP-RAR-mZn<br>(Zinc-finger mutant)            | - | 2.89 ± 0.7                 | 105 ± 61  | 29% ± 6%  |
|                                                 | + | 3.40 ± 0.99                | 111 ± 61  | 35% ± 9%  |
| EGFP-RAR-LBD<br>(ligand binding domain only)    | - | 1.62 ± 0.62                | 99 ± 101  | 17% ± 11% |
|                                                 | + | 2.05 ± 1.20                | 114 ± 138 | 27% ± 15% |
