# Supplementary material
Source: PubMed Central journal article supplement (PMC3215574)
Supplement: supp_124.21.3631_JCS086082TableS3.pdf [file supp_124.21.3631_JCS086082TableS3.pdf]

**Table S3. Comparison of RAR-expression in non-transfected (HeLa) and stable transfectant (sGFP-RAR HeLa) cell lines based on confocal microscopic evaluation of fluorescence intensities from immunolabeled RAR**

|                                                            | <b>Intensity</b> |             |
|------------------------------------------------------------|------------------|-------------|
|                                                            | <b>Mean</b>      | <b>s.d.</b> |
| <b>Control</b>                                             | <b>60</b>        | <b>6</b>    |
| <b>HeLa</b>                                                | <b>225</b>       | <b>19</b>   |
| <b>sEGFP-RAR HeLa</b>                                      | <b>380</b>       | <b>38</b>   |
|                                                            |                  |             |
| <b>Corrected</b>                                           |                  |             |
| <b>HeLa</b>                                                | <b>165</b>       |             |
| <b>sEGFP-RAR HeLa</b>                                      | <b>320</b>       |             |
|                                                            |                  |             |
| <b>Ratio of expression</b><br><i>(sEGFP-RAR-HeLa/HeLa)</i> | <b>2</b>         |             |
